# Supplementary material for: The Associations of Suspected COVID-19 Symptoms with Anxiety and Depression as Modified by Hemodialysis Dietary Knowledge: A Multi-Dialysis Center Study
Source: MDPI journal article supplement (doi:10.3390/nu14122364), 2022-06-07
Supplement: s1 [file s1]

**Table S1.** The correlations between independent variables

|                 | Age     | Gender | Education | Working | Marital | Social  | Payment status | S-COVID19-S | BMI   | Edema   | Hyperthyroidism | Hospitalization | PA      | HL    | DDL   | HDK   |
|-----------------|---------|--------|-----------|---------|---------|---------|----------------|-------------|-------|---------|-----------------|-----------------|---------|-------|-------|-------|
| Age             | 1.000   |        |           |         |         |         |                |             |       |         |                 |                 |         |       |       |       |
| Gender          | .050    | 1.000  |           |         |         |         |                |             |       |         |                 |                 |         |       |       |       |
| Education       | -.099** | -.065  | 1.000     |         |         |         |                |             |       |         |                 |                 |         |       |       |       |
| Working         | -.063   | -.086* | .379**    | 1.000   |         |         |                |             |       |         |                 |                 |         |       |       |       |
| Marital         | .205**  | .004   | -.095**   | .153**  | 1.000   |         |                |             |       |         |                 |                 |         |       |       |       |
| social          | -.022   | -.043  | .336**    | .222**  | .035    | 1.000   |                |             |       |         |                 |                 |         |       |       |       |
| payment         | .040    | -.047  | .182**    | .138**  | .017    | .266**  | 1.000          |             |       |         |                 |                 |         |       |       |       |
| S-COVID19-S     | .072*   | .086*  | .047      | .017    | .053    | -.122** | -.152**        | 1.000       |       |         |                 |                 |         |       |       |       |
| BMI             | -.009   | -.032  | .000      | -.006   | .033    | -.003   | .066           | -.002       | 1.000 |         |                 |                 |         |       |       |       |
| Edema           | .019    | .067*  | -.113**   | .005    | .061    | -.178** | -.199**        | .187**      | .018  | 1.000   |                 |                 |         |       |       |       |
| Hyperthyroidism | -.080*  | .083*  | .030      | -.031   | -.020   | -.048   | .012           | .055        | -.028 | -.062   | 1.000           |                 |         |       |       |       |
| Hospitalization | -.012   | .001   | -.002     | -.037   | .016    | -.093** | -.070*         | -.063       | .008  | .106**  | .017            | 1.000           |         |       |       |       |
| PA              | -.031   | -.096* | .188**    | .073    | -.006   | .242**  | .305**         | -.238**     | .058  | -.335** | -.006           | .029            | 1.000   |       |       |       |
| CCI             | .162**  | .066   | -.085*    | -.041   | .124**  | -.150** | -.238**        | .267**      | .021  | .334**  | .035            | .098**          | -.406** |       |       |       |
| HL              | -.144** | -.044  | .243**    | .193**  | -.022   | .147**  | .230**         | -.011       | -.030 | -.103** | .039            | -.024           | .185**  | 1.000 |       |       |
| DDL             | -.131** | -.087* | .259**    | .164**  | -.057   | .087*   | .178**         | -.007       | -.027 | -.147** | .036            | .008            | .160**  | .742* | 1.000 |       |
| HDK             | -.024   | -.031  | -.016     | -.025   | -.042   | .091**  | .143**         | -.054       | -.012 | -.176** | .090**          | -.014           | .081*   | .226* | .205* | 1.000 |

Abbreviation: S-COVID-19-S, suspected COVID-19 symptoms; BMI, body mass index; HD, hemodialysis; PA, physical activity; CCI, Charlson Comorbidity index; HL, health literacy; DDL, digital healthy diet literacy; HDK, hemodialysis dietary knowledge.

**Table S2.** Conditional effect of S-COVID-19-S on anxiety at values of HDK

| HDK            | Effect | p       | LLCI | ULCI |
|----------------|--------|---------|------|------|
| -2.6003 (−1SD) | 4.4074 | < 0.001 | 2.95 | 5.87 |
| .0000 (Mean)   | 2.7755 | < 0.001 | 1.90 | 3.65 |
| 2.6003 (+1SD)  | 1.1436 | 0.0382  | 0.06 | 2.23 |

Abbreviation: S-COVID-19-S, suspected COVID 19 symptoms; HDK, Hemodialysis dietary knowledge; +1SD, one standard deviation above the mean; −1SD, one standard deviation below the mean; LLCI, lower limit confidence interval; ULCI: upper limit confidence interval.

**Table S3.** Data for visualizing the conditional effect of S-COVID-19-S on anxiety

| S-COVID-19-S | HDK     | Probability of Anxiety |
|--------------|---------|------------------------|
| .0000        | -2.6003 | .0163                  |
| 1.000        | -2.6003 | .5766                  |
| .0000        | .0000   | .0282                  |
| 1.000        | .0000   | .3180                  |
| .0000        | +2.6003 | .0484                  |
| 1.000        | +2.6003 | .1377                  |

Abbreviation: S-COVID-19-S, suspected COVID 19 symptoms.

**Table S4.** Conditional effect of S-COVID-19-S on depression at values of HDK

| <b>HDK</b>     | <b>Effect</b> | <b>p</b> | <b>LLCI</b> | <b>ULCI</b> |
|----------------|---------------|----------|-------------|-------------|
| -2.6003 (−1SD) | 3.8368        | < 0.001  | 2.83        | 4.85        |
| .0000 (Mean)   | 2.4547        | < 0.001  | 1.81        | 3.10        |
| 2.6003 (+1SD)  | 1.0726        | 0.0167   | 0.19        | 1.95        |

Abbreviation: S-COVID-19-S, suspected COVID 19 symptoms; HDK, Hemodialysis dietary knowledge; +1SD, one standard deviation above the mean; −1SD, one standard deviation below the mean; LLCI, lower limit confidence interval; ULCI: upper limit confidence interval.

**Table S5.** Data for visualizing the conditional effect of S-COVID-19-S on depression

| <b>S-COVID-19-S</b> | <b>HDK</b> | <b>Probability of Anxiety</b> |
|---------------------|------------|-------------------------------|
| .0000               | -2.6003    | .0455                         |
| 1.000               | -2.6003    | .6884                         |
| .0000               | .0000      | .0628                         |
| 1.000               | .0000      | .4381                         |
| .0000               | +2.6003    | .0806                         |
| 1.000               | +2.6003    | .2158                         |

Abbreviation: S-COVID-19-S, suspected COVID 19 symptoms.
